# Supplementary material for: Remarkable near-infrared emission enhancement of Cr3+-activated BaGe4O9: the role of lithium ions
Source: Royal Society of Chemistry journal article supplement (doi:10.1039/d3tc04784a), 2024-01-01
Supplement: d3tc04784a1.pdf [file d3tc04784a1.pdf]

## **Remarkable near-infrared emission enhancement of Cr<sup>3+</sup>- activated BaGe<sub>4</sub>O<sub>9</sub>: The role of lithium ion**

Yuechao Tang,<sup>a</sup> Jin Yang,<sup>a</sup> Qinan Mao,<sup>\*a</sup> Yang Ding,<sup>a</sup> Guojun Zheng,<sup>b</sup> Lang Pei<sup>a</sup> and

Jiasong Zhong<sup>\*a</sup>

*<sup>a</sup> Center for Advanced Optoelectronic Materials, College of Materials and Environmental Engineering, Hangzhou Dianzi University, Hangzhou 310018, People's Republic of China.*

*E-mail: maoqinan@hdu.edu.cn, jiasongzhong@hdu.edu.cn*

*<sup>b</sup> Institute of Light+X Science and Technology, College of Information Science and Engineering, Ningbo University, Ningbo 315211, People's Republic of China.*

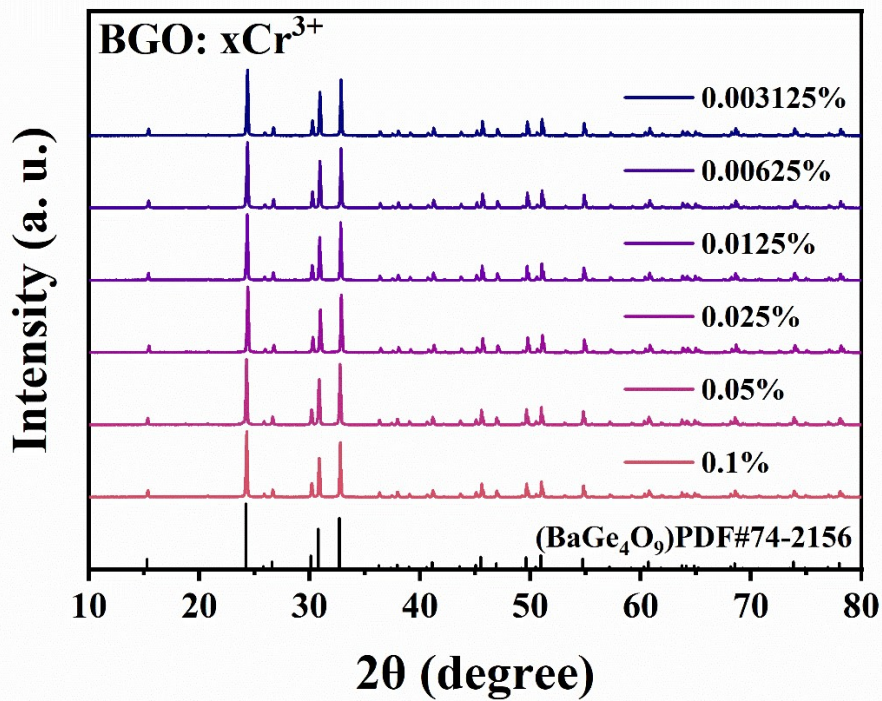

Fig. S1 XRD patterns of BGO:xCr<sup>3+</sup> (x=0.003125%~0.1%) phosphors.

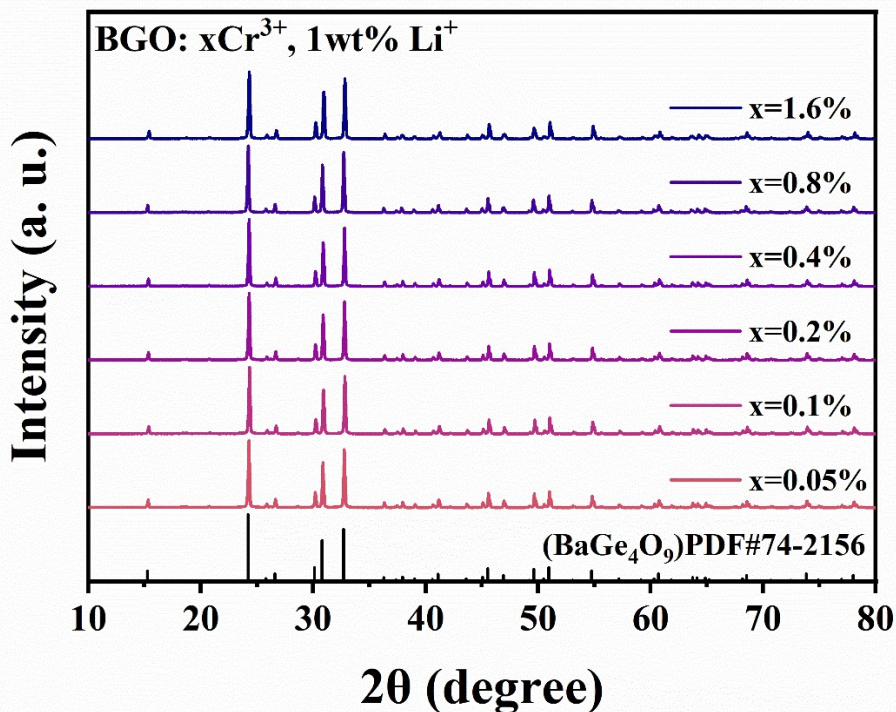

Fig. S2 XRD patterns of BGO:xCr<sup>3+</sup>, 1wt%Li<sup>+</sup> (x=0.05%~1.6%) phosphors.

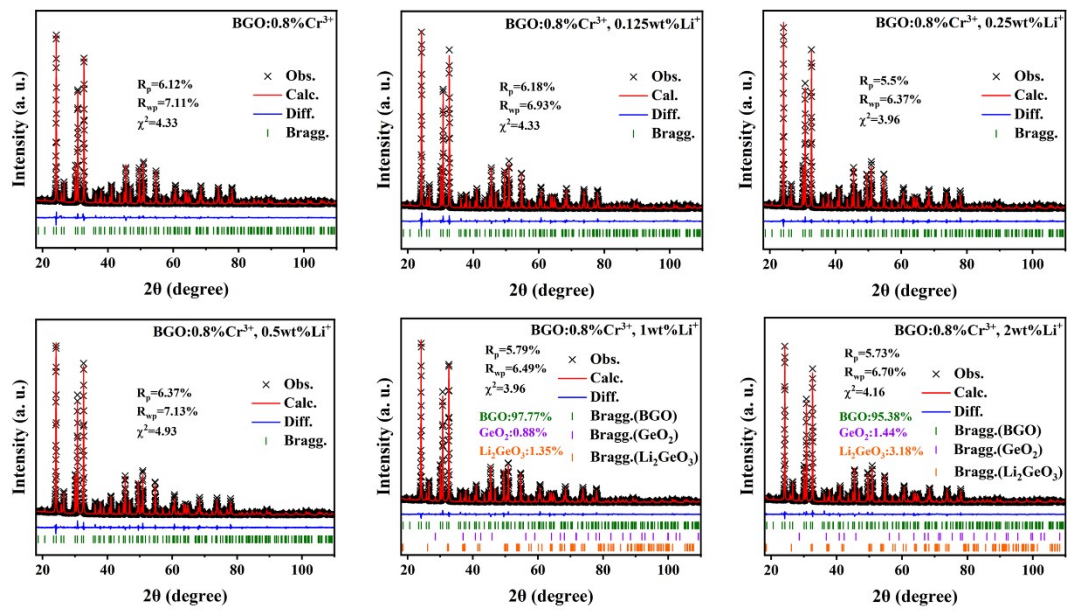

Fig. S3 XRD Rietveld refinements of BGO:0.8%Cr<sup>3+</sup>, yLi<sup>+</sup> (y=0-2wt%) phosphors.

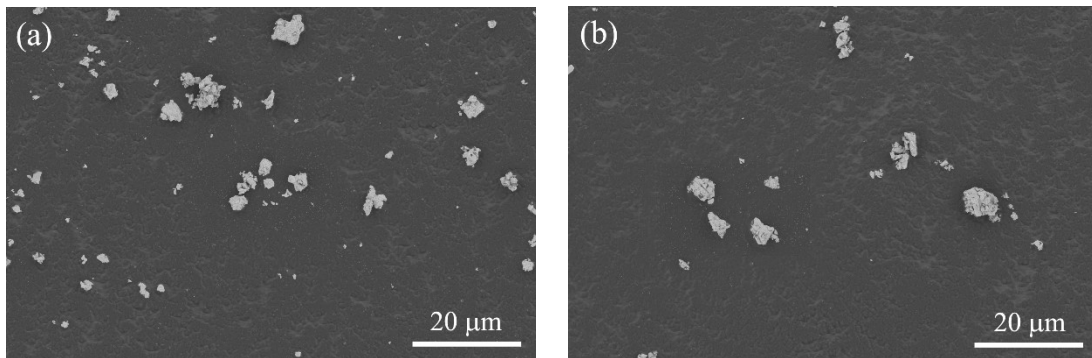

Fig. S4 SEM images of (a) BGO:Cr<sup>3+</sup> and BGO:Cr<sup>3+</sup>, Li<sup>+</sup> phosphors



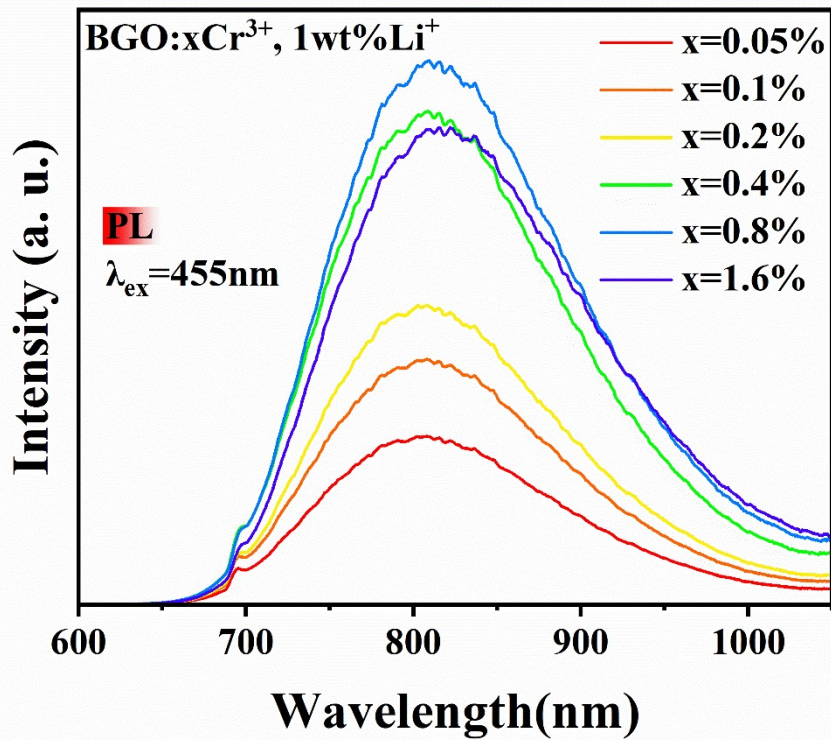

Fig. S5 PL spectra of BGO: $x\text{Cr}^{3+}$ , 1wt% $\text{Li}^+$  ( $x=0.05\%$ -1.6%) phosphors.

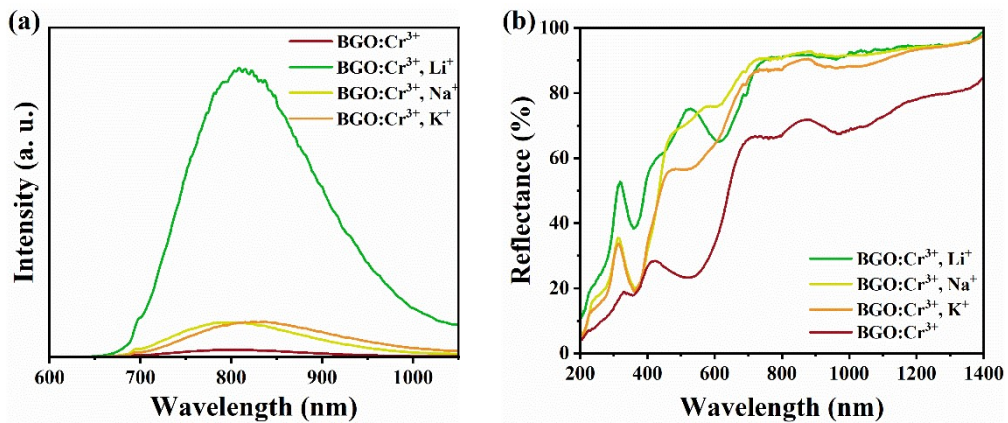

Fig. S6 (a) PL spectra and (b) diffuse reflectance spectra of BGO: $\text{Cr}^{3+}$ , BGO: $\text{Cr}^{3+}$ , $\text{Li}^+$ , BGO: $\text{Cr}^{3+}$ , $\text{Na}^+$  and BGO: $\text{Cr}^{3+}$ , $\text{K}^+$ .

Table S1 Ionic radius differences between Li<sup>+</sup> and host cations

| <b>Ion</b>                         | Li <sup>+</sup><br>(CN=8) | Ba <sup>2+</sup><br>(CN=8) | Li <sup>+</sup><br>(CN=6) | Ge <sup>4+</sup><br>(CN=6) | Li <sup>+</sup><br>(CN=4) | Ge <sup>4+</sup><br>(CN=4) |
|------------------------------------|---------------------------|----------------------------|---------------------------|----------------------------|---------------------------|----------------------------|
| <b>Ionic radius (Å)</b>            | 0.92                      | 1.42                       | 0.76                      | 0.53                       | 0.59                      | 0.39                       |
| <b>Ionic radius difference (%)</b> | 35%                       |                            | 43%                       |                            | 51%                       |                            |

The ionic radius difference ( $D_r$ ) is calculated by the following equation

$$D_r = \left| \frac{R_s(\text{CN}) - R_d(\text{CN})}{R_s(\text{CN})} \right| \times 100\%$$

where  $R_s$  is the ionic radius of the cations possibly substituted by Li<sup>+</sup>,  $R_d$  is the ionic radius of Li<sup>+</sup> and CN represents coordination number.
